# Supplementary material
Source: MDPI journal article supplement (https://www.mdpi.com/2304-6767/10/5/92)
Supplement: s1 [file s1]

## Supplementary material

**Supplementary Table S1.** Search Strategies

| Database        | PubMed<br>Date: 19/04/2021 |                                                                                                                                                             | Results |
|-----------------|----------------------------|-------------------------------------------------------------------------------------------------------------------------------------------------------------|---------|
| Search Strategy | #1                         | Oral Health[Mesh]                                                                                                                                           | 17,462  |
|                 | #2                         | Oral Health[tiab]                                                                                                                                           | 28,498  |
|                 | #3                         | Oral Hygiene[Mesh]                                                                                                                                          | 19,824  |
|                 | #4                         | Oral Hygiene[tiab]                                                                                                                                          | 13,909  |
|                 | #5                         | Tooth Brush*[tiab]                                                                                                                                          | 2,128   |
|                 | #6                         | Toothbrush*[tiab]                                                                                                                                           | 5,873   |
|                 | #7                         | Dental Brush*[tiab]                                                                                                                                         | 48      |
|                 | #8                         | Dental Devices, Home Care[Mesh]                                                                                                                             | 2,025   |
|                 | #9                         | Dental Floss*[tiab]                                                                                                                                         | 713     |
|                 | #10                        | Dental Device*[tiab]                                                                                                                                        | 240     |
|                 | #11                        | Dental Cleaning[tiab]                                                                                                                                       | 180     |
|                 | #12                        | Dental Hygien*[tiab]                                                                                                                                        | 5,26    |
|                 | #13                        | Mouthwashes[Mesh]                                                                                                                                           | 7,033   |
|                 | #14                        | Mouth Wash*[tiab]                                                                                                                                           | 328     |
|                 | #15                        | Mouthwash*[tiab]                                                                                                                                            | 2,899   |
|                 | #16                        | Oral Wash*[tiab]                                                                                                                                            | 119     |
|                 | #17                        | Oral Rinse*[tiab]                                                                                                                                           | 817     |
|                 | #18                        | Mouth Rinse*[tiab]                                                                                                                                          | 1,051   |
|                 | #19                        | Dentifrices[Mesh]                                                                                                                                           | 6,97    |
|                 | #20                        | Dentifrice*[tiab]                                                                                                                                           | 3,312   |
|                 | #21                        | Toothpaste*[tiab]                                                                                                                                           | 4,573   |
|                 | #22                        | Tooth Paste*[tiab]                                                                                                                                          | 229     |
|                 | #23                        | Denture Clean*[tiab]                                                                                                                                        | 460     |
|                 | #24                        | Denture Hygiene[tiab]                                                                                                                                       | 234     |
|                 | #25                        | #1 OR #2 OR #3 OR #4 OR #5 OR #6 OR #7 OR #8 OR #9 OR #10 OR #11 OR #12 OR #13 OR #14 OR #15 OR #16 OR #17 OR #18 OR #19 OR #20 OR #21 OR #22 OR #23 OR #24 | 72,175  |
|                 | #26                        | Dementia[Majr]                                                                                                                                              | 143,205 |
|                 | #27                        | Dementia[tiab]                                                                                                                                              | 117,61  |
|                 | #28                        | Amentia[tiab]                                                                                                                                               | 79      |
|                 | #29                        | Alzheimer[tiab]                                                                                                                                             | 157,396 |
|                 | #30                        | Cognitive Dysfunction[Mesh]                                                                                                                                 | 21,39   |
|                 | #31                        | Cognitive Dysfunction*[tiab]                                                                                                                                | 16,643  |
|                 | #32                        | Cognitive Impair*[tiab]                                                                                                                                     | 71,432  |
|                 | #33                        | Cognitive Disorder*[tiab]                                                                                                                                   | 5,051   |
|                 | #34                        | Cognitive Decline*[tiab]                                                                                                                                    | 25,012  |
|                 | #35                        | Cognitive Deterior*[tiab]                                                                                                                                   | 1,928   |
|                 | #36                        | Neurocognitive Impair*[tiab]                                                                                                                                | 2,506   |
|                 | #37                        | Neurocognitive Disorder*[tiab]                                                                                                                              | 2,947   |
|                 | #38                        | Neurocognitive Decline*[tiab]                                                                                                                               | 413     |
|                 | #39                        | Neurocognitive Deterior*[tiab]                                                                                                                              | 51      |
|                 | #40                        | Mental Deterior*[tiab]                                                                                                                                      | 1,075   |

|  |     |                                                                                                             |       |
|--|-----|-------------------------------------------------------------------------------------------------------------|-------|
|  | #41 | #26 OR #27 OR #28 OR #29 OR #30 OR #31 OR #32 OR<br>#33 OR #34 OR #35 OR #36 OR #37 OR #38 OR #39 OR<br>#40 | 324,1 |
|  | #42 | #25 AND #41                                                                                                 | 533   |

|                 |                                       |                                                                                                                                                      |         |
|-----------------|---------------------------------------|------------------------------------------------------------------------------------------------------------------------------------------------------|---------|
| Database        | EMBase (Elsevier)<br>Date: 19/04/2021 |                                                                                                                                                      | Results |
| Search Strategy | #1                                    | (oral NEAR/1 health):ti,ab                                                                                                                           | 29,05   |
|                 | #2                                    | mouth hygiene'/exp                                                                                                                                   | 27,774  |
|                 | #3                                    | (oral NEAR/1 hygiene):ti,ab                                                                                                                          | 14,916  |
|                 | #4                                    | (tooth NEAR/1 brush*):ti,ab                                                                                                                          | 2,327   |
|                 | #5                                    | toothbrush*:ti,ab                                                                                                                                    | 5,691   |
|                 | #6                                    | (dental NEAR/1 brush*):ti,ab                                                                                                                         | 97      |
|                 | #7                                    | dental device'/exp                                                                                                                                   | 146,512 |
|                 | #8                                    | (dental NEAR/1 floss*):ti,ab                                                                                                                         | 802     |
|                 | #9                                    | (dental NEAR/1 device*):ti,ab                                                                                                                        | 265     |
|                 | #10                                   | (dental NEAR/1 cleaning):ti,ab                                                                                                                       | 219     |
|                 | #11                                   | (dental NEAR/1 hygien*):ti,ab                                                                                                                        | 5,511   |
|                 | #12                                   | mouthwash'/exp                                                                                                                                       | 4,986   |
|                 | #13                                   | (mouth NEAR/1 wash*):ti,ab                                                                                                                           | 497     |
|                 | #14                                   | mouthwash*:ti,ab                                                                                                                                     | 3,485   |
|                 | #15                                   | (oral NEAR/1 wash*):ti,ab                                                                                                                            | 211     |
|                 | #16                                   | (oral NEAR/1 rinse*):ti,ab                                                                                                                           | 977     |
|                 | #17                                   | (mouth NEAR/1 rinse*):ti,ab                                                                                                                          | 1,198   |
|                 | #18                                   | toothpaste'/exp                                                                                                                                      | 8,691   |
|                 | #19                                   | dentifrice*:ti,ab                                                                                                                                    | 3,121   |
|                 | #20                                   | toothpaste*:ti,ab                                                                                                                                    | 4,991   |
|                 | #21                                   | (tooth NEAR/1 paste*):ti,ab                                                                                                                          | 322     |
|                 | #22                                   | (denture NEAR/1 clean*):ti,ab                                                                                                                        | 445     |
|                 | #23                                   | (denture NEAR/3 hygiene):ti,ab                                                                                                                       | 278     |
|                 | #24                                   | #1 OR #2 OR #3 OR #4 OR #5 OR #6 OR #7 OR #8 OR #9 OR #10 OR #11 OR #12 OR #13 OR #14 OR #15 OR #16 OR #17 OR #18 OR #19 OR #20 OR #21 OR #22 OR #23 | 211,795 |
|                 | #25                                   | dementia'/exp/mj                                                                                                                                     | 230,269 |
|                 | #26                                   | dementia:ti,ab                                                                                                                                       | 165,979 |
|                 | #27                                   | ementia:ti,ab                                                                                                                                        | 93      |
|                 | #28                                   | alzheimer disease'/exp                                                                                                                               | 210,189 |
|                 | #29                                   | alzheimer:ti,ab                                                                                                                                      | 208,778 |
|                 | #30                                   | cognitive defect'/exp                                                                                                                                | 522,616 |
|                 | #31                                   | (cognitive NEAR/1 dysfunction*):ti,ab                                                                                                                | 24,492  |
|                 | #32                                   | (cognitive NEAR/1 impair*):ti,ab                                                                                                                     | 112,865 |
|                 | #33                                   | (cognitive NEAR/1 disorder*):ti,ab                                                                                                                   | 8,386   |
|                 | #34                                   | (cognitive NEAR/1 decline*):ti,ab                                                                                                                    | 38,283  |
|                 | #35                                   | (cognitive NEAR/1 deterior*):ti,ab                                                                                                                   | 3,28    |
|                 | #36                                   | (neurocognitive NEAR/1 impair*):ti,ab                                                                                                                | 4,16    |
|                 | #37                                   | (neurocognitive NEAR/1 disorder*):ti,ab                                                                                                              | 4,475   |
|                 | #38                                   | (neurocognitive NEAR/1 decline*):ti,ab                                                                                                               | 739     |
|                 | #39                                   | (neurocognitive NEAR/1 deterior*):ti,ab                                                                                                              | 94      |
|                 | #40                                   | (mental NEAR/1 deterior*):ti,ab                                                                                                                      | 1,688   |
|                 | #41                                   | #25 OR #26 OR #27 OR #28 OR #29 OR #30 OR #31 OR #32 OR #33 OR #34 OR #35 OR #36 OR #37 OR #38 OR #39 OR #40                                         | 598,179 |
|                 | #42                                   | #24 AND #41                                                                                                                                          | 1,108   |

| Database        | Cochrane Library<br>Date: 19/04/2021 |                                                                                                                                                             | Results |
|-----------------|--------------------------------------|-------------------------------------------------------------------------------------------------------------------------------------------------------------|---------|
| Search Strategy | #1                                   | MeSH descriptor: [Oral Health] explode all trees                                                                                                            | 429     |
|                 | #2                                   | (Oral NEAR/1 Health):ti,ab,kw                                                                                                                               | 3428    |
|                 | #3                                   | MeSH descriptor: [Oral Hygiene] explode all trees                                                                                                           | 2219    |
|                 | #4                                   | (Oral NEAR/1 Hygiene):ti,ab,kw                                                                                                                              | 4419    |
|                 | #5                                   | (Tooth NEAR/1 Brush*):ti,ab,kw                                                                                                                              | 1445    |
|                 | #6                                   | Toothbrush*:ti,ab,kw                                                                                                                                        | 2955    |
|                 | #7                                   | (Dental NEAR/1 Brush*):ti,ab,kw                                                                                                                             | 69      |
|                 | #8                                   | MeSH descriptor: [Dental Devices, Home Care] explode all trees                                                                                              | 375     |
|                 | #9                                   | (Dental NEAR/1 Floss*):ti,ab,kw                                                                                                                             | 506     |
|                 | #10                                  | (Dental NEAR/1 Device*):ti,ab,kw                                                                                                                            | 484     |
|                 | #11                                  | (Dental NEAR/1 Cleaning):ti,ab,kw                                                                                                                           | 56      |
|                 | #12                                  | (Dental NEAR/1 Hygien*):ti,ab,kw                                                                                                                            | 452     |
|                 | #13                                  | MeSH descriptor: [Mouthwashes] explode all trees                                                                                                            | 1665    |
|                 | #14                                  | (Mouth NEAR/1 Wash*):ti,ab,kw                                                                                                                               | 283     |
|                 | #15                                  | Mouthwash*:ti,ab,kw                                                                                                                                         | 3083    |
|                 | #16                                  | (Oral NEAR/1 Wash*):ti,ab,kw                                                                                                                                | 38      |
|                 | #17                                  | (Oral NEAR/1 Rinse*):ti,ab,kw                                                                                                                               | 369     |
|                 | #18                                  | (Mouth NEAR/1 Rinse*):ti,ab,kw                                                                                                                              | 774     |
|                 | #19                                  | MeSH descriptor: [Dentifrices] explode all trees                                                                                                            | 1593    |
|                 | #20                                  | Dentifrice*:ti,ab,kw                                                                                                                                        | 2182    |
|                 | #21                                  | Toothpaste*:ti,ab,kw                                                                                                                                        | 2250    |
|                 | #22                                  | (Tooth NEAR/1 Paste*):ti,ab,kw                                                                                                                              | 135     |
|                 | #23                                  | (Denture NEAR/1 Clean*):ti,ab,kw                                                                                                                            | 109     |
|                 | #24                                  | (Denture NEAR/1 Hygiene):ti,ab,kw                                                                                                                           | 47      |
|                 | #25                                  | #1 OR #2 OR #3 OR #4 OR #5 OR #6 OR #7 OR #8 OR #9 OR #10 OR #11 OR #12 OR #13 OR #14 OR #15 OR #16 OR #17 OR #18 OR #19 OR #20 OR #21 OR #22 OR #23 OR #24 | 14392   |
|                 | #26                                  | MeSH descriptor: [Dementia] explode all trees                                                                                                               | 6074    |
|                 | #27                                  | Dementia:ti,ab,kw                                                                                                                                           | 13261   |
|                 | #28                                  | Amentia:ti,ab,kw                                                                                                                                            | 1       |
|                 | #29                                  | Alzheimer:ti,ab,kw                                                                                                                                          | 11366   |
|                 | #30                                  | MeSH descriptor: [Cognitive Dysfunction] explode all trees                                                                                                  | 1675    |
|                 | #31                                  | (Cognitive NEAR/1 Dysfunction*):ti,ab,kw                                                                                                                    | 3570    |
|                 | #32                                  | (Cognitive NEAR/1 Impair*):ti,ab,kw                                                                                                                         | 9647    |
|                 | #33                                  | (Cognitive NEAR/1 Disorder*):ti,ab,kw                                                                                                                       | 852     |
|                 | #34                                  | (Cognitive NEAR/1 Decline*):ti,ab,kw                                                                                                                        | 2974    |
|                 | #35                                  | (Cognitive NEAR/1 Deterior*):ti,ab,kw                                                                                                                       | 328     |
|                 | #36                                  | (Neurocognitive NEAR/1 Impair*):ti,ab,kw                                                                                                                    | 267     |
|                 | #37                                  | (Neurocognitive NEAR/1 Disorder*):ti,ab,kw                                                                                                                  | 383     |
|                 | #38                                  | (Neurocognitive NEAR/1 Decline*):ti,ab,kw                                                                                                                   | 70      |
|                 | #39                                  | (Neurocognitive NEAR/1 Deterior*):ti,ab,kw                                                                                                                  | 15      |
|                 | #40                                  | (Mental NEAR/1 Deterior*):ti,ab,kw                                                                                                                          | 215     |
|                 | #41                                  | #26 OR #27 OR #28 OR #29 OR #30 OR #31 OR #32 OR #33 OR #34 OR #35 OR #36 OR #37 OR #38 OR #39 OR #40                                                       | 30205   |
|                 | #42                                  | #25 AND #41                                                                                                                                                 | 67      |

|                 |                                    |                                                                                                                                                             |         |
|-----------------|------------------------------------|-------------------------------------------------------------------------------------------------------------------------------------------------------------|---------|
| Database        | CINAHL (EBSCO)<br>Date: 18/04/2021 |                                                                                                                                                             | Results |
| Search Strategy | #1                                 | (MH "Oral Health")                                                                                                                                          | 12,932  |
|                 | #2                                 | TI (Oral N1 Health) OR AB (Oral N1 Health)                                                                                                                  | 14,903  |
|                 | #3                                 | (MH "Oral Hygiene+")                                                                                                                                        | 7,928   |
|                 | #4                                 | TI (Oral N1 Hygiene) OR AB (Oral N1 Hygiene)                                                                                                                | 4,057   |
|                 | #5                                 | TI (Tooth N1 Brush*) OR AB (Tooth N1 Brush*)                                                                                                                | 1,265   |
|                 | #6                                 | TI Toothbrush* OR AB Toothbrush*                                                                                                                            | 1,878   |
|                 | #7                                 | TI (Dental N1 Brush*) OR AB (Dental N1 Brush*)                                                                                                              | 101     |
|                 | #8                                 | (MH "Dental Devices, Home Care+")                                                                                                                           | 1,58    |
|                 | #9                                 | TI (Dental N1 Floss*) OR AB (Dental N1 Floss*)                                                                                                              | 318     |
|                 | #10                                | TI (Dental N1 Device*) OR AB (Dental N1 Device*)                                                                                                            | 140     |
|                 | #11                                | TI (Dental N1 Cleaning) OR AB (Dental N1 Cleaning)                                                                                                          | 103     |
|                 | #12                                | TI (Dental N1 Hygien*) OR AB (Dental N1 Hygien*)                                                                                                            | 6,266   |
|                 | #13                                | (MH "Mouthwashes+")                                                                                                                                         | 2,492   |
|                 | #14                                | TI (Mouth N1 Wash*) OR AB (Mouth N1 Wash*)                                                                                                                  | 71      |
|                 | #15                                | TI Mouthwash* OR AB Mouthwash*                                                                                                                              | 882     |
|                 | #16                                | TI (Oral N1 Wash*) OR AB (Oral N1 Wash*)                                                                                                                    | 42      |
|                 | #17                                | TI (Oral N1 Rinse*) OR AB (Oral N1 Rinse*)                                                                                                                  | 328     |
|                 | #18                                | TI (Mouth N1 Rinse*) OR AB (Mouth N1 Rinse*)                                                                                                                | 483     |
|                 | #19                                | (MH "Dentifrices")                                                                                                                                          | 2,265   |
|                 | #20                                | TI Dentifrice* OR AB Dentifrice*                                                                                                                            | 663     |
|                 | #21                                | TI Toothpaste* OR AB Toothpaste*                                                                                                                            | 1,44    |
|                 | #22                                | TI (Tooth N1 Paste*) OR AB (Tooth N1 Paste*)                                                                                                                | 42      |
|                 | #23                                | TI (Denture N1 Clean*) OR AB (Denture N1 Clean*)                                                                                                            | 134     |
|                 | #24                                | TI (Denture N1 Hygiene) OR AB (Denture N1 Hygiene)                                                                                                          | 77      |
|                 | #25                                | S1 OR S2 OR S3 OR S4 OR S5 OR S6 OR S7 OR S8 OR S9 OR S10 OR S11 OR S12 OR S13 OR S14 OR S15 OR S16 OR S17 OR S18 OR S19 OR S20 OR S21 OR S22 OR S23 OR S24 | 23,741  |
|                 | #26                                | (MH "Dementia+")                                                                                                                                            | 76,094  |
|                 | #27                                | TI Dementia OR AB Dementia                                                                                                                                  | 54,557  |
|                 | #28                                | TI Amentia OR AB Amentia                                                                                                                                    | 3       |
|                 | #29                                | (MH "Alzheimer's Disease")                                                                                                                                  | 33,447  |
|                 | #30                                | TI Alzheimer OR AB Alzheimer                                                                                                                                | 27,55   |
|                 | #31                                | (MH "Cognition Disorders+")                                                                                                                                 | 33,027  |
|                 | #32                                | TI (Cognitive N1 Dysfunction*) OR AB (Cognitive N1 Dysfunction*)                                                                                            | 3,946   |
|                 | #33                                | TI (Cognitive N1 Impair*) OR AB (Cognitive N1 Impair*)                                                                                                      | 26,672  |
|                 | #34                                | TI (Cognitive N1 Disorder*) OR AB (Cognitive N1 Disorder*)                                                                                                  | 1,791   |
|                 | #35                                | TI (Cognitive N1 Decline*) OR AB (Cognitive N1 Decline*)                                                                                                    | 9,629   |
|                 | #36                                | TI (Cognitive N1 Deterior*) OR AB (Cognitive N1 Deterior*)                                                                                                  | 771     |
|                 | #37                                | TI (Neurocognitive N1 Impair*) OR AB (Neurocognitive N1 Impair*)                                                                                            | 818     |
|                 | #38                                | TI (Neurocognitive N1 Disorder*) OR AB (Neurocognitive N1 Disorder*)                                                                                        | 766     |
|                 | #39                                | TI (Neurocognitive N1 Decline*) OR AB (Neurocognitive N1 Decline*)                                                                                          | 144     |
|                 | #40                                | TI (Neurocognitive N1 Deterior*) OR AB (Neurocognitive N1 Deterior*)                                                                                        | 20      |
|                 | #41                                | TI (Mental N1 Deterior*) OR AB (Mental N1 Deterior*)                                                                                                        | 311     |
|                 | #42                                | S26 OR S27 OR S28 OR S29 OR S30 OR S31 OR S32 OR S33 OR S34 OR S35 OR S36 OR S37 OR S38 OR S39 OR S40 OR S41                                                | 91,252  |
|                 | #43                                | S25 AND S42                                                                                                                                                 | 363     |

|                 |                                                              |                                                                                                                                                             |          |
|-----------------|--------------------------------------------------------------|-------------------------------------------------------------------------------------------------------------------------------------------------------------|----------|
| Database        | Dentistry & Oral Sciences Source (EBSCO)<br>Date: 19/04/2021 |                                                                                                                                                             | Results  |
| Search Strategy | #1                                                           | (MH "Oral Health")                                                                                                                                          |          |
|                 | #2                                                           | TI (Oral N1 Health) OR AB (Oral N1 Health)                                                                                                                  | (20,494) |
|                 | #3                                                           | (MH "Oral Hygiene+")                                                                                                                                        | (0)      |
|                 | #4                                                           | TI (Oral N1 Hygiene) OR AB (Oral N1 Hygiene)                                                                                                                | (7,847)  |
|                 | #5                                                           | TI (Tooth N1 Brush*) OR AB (Tooth N1 Brush*)                                                                                                                | (2,008)  |
|                 | #6                                                           | TI Toothbrush* OR AB Toothbrush*                                                                                                                            | (3,563)  |
|                 | #7                                                           | TI (Dental N1 Brush*) OR AB (Dental N1 Brush*)                                                                                                              | (168)    |
|                 | #8                                                           | (MH "Dental Devices, Home Care+")                                                                                                                           | (0)      |
|                 | #9                                                           | TI (Dental N1 Floss*) OR AB (Dental N1 Floss*)                                                                                                              | (539)    |
|                 | #10                                                          | TI (Dental N1 Device*) OR AB (Dental N1 Device*)                                                                                                            | (277)    |
|                 | #11                                                          | TI (Dental N1 Cleaning) OR AB (Dental N1 Cleaning)                                                                                                          | (170)    |
|                 | #12                                                          | TI (Dental N1 Hygien*) OR AB (Dental N1 Hygien*)                                                                                                            | (9,106)  |
|                 | #13                                                          | (MH "Mouthwashes+")                                                                                                                                         | (0)      |
|                 | #14                                                          | TI (Mouth N1 Wash*) OR AB (Mouth N1 Wash*)                                                                                                                  | (105)    |
|                 | #15                                                          | TI Mouthwash* OR AB Mouthwash*                                                                                                                              | (1,303)  |
|                 | #16                                                          | TI (Oral N1 Wash*) OR AB (Oral N1 Wash*)                                                                                                                    | (20)     |
|                 | #17                                                          | TI (Oral N1 Rinse*) OR AB (Oral N1 Rinse*)                                                                                                                  | (340)    |
|                 | #18                                                          | TI (Mouth N1 Rinse*) OR AB (Mouth N1 Rinse*)                                                                                                                | (649)    |
|                 | #19                                                          | (MH "Dentifrices")                                                                                                                                          | (1,691)  |
|                 | #20                                                          | TI Dentifrice* OR AB Dentifrice*                                                                                                                            | (1,584)  |
|                 | #21                                                          | TI Toothpaste* OR AB Toothpaste*                                                                                                                            | (2,857)  |
|                 | #22                                                          | TI (Tooth N1 Paste*) OR AB (Tooth N1 Paste*)                                                                                                                | (152)    |
|                 | #23                                                          | TI (Denture N1 Clean*) OR AB (Denture N1 Clean*)                                                                                                            | (323)    |
|                 | #24                                                          | TI (Denture N1 Hygiene) OR AB (Denture N1 Hygiene)                                                                                                          | (164)    |
|                 | #25                                                          | S1 OR S2 OR S3 OR S4 OR S5 OR S6 OR S7 OR S8 OR S9 OR S10 OR S11 OR S12 OR S13 OR S14 OR S15 OR S16 OR S17 OR S18 OR S19 OR S20 OR S21 OR S22 OR S23 OR S24 | (42,150) |
|                 | #26                                                          | (MH "Dementia+")                                                                                                                                            | (0)      |
|                 | #27                                                          | TI Dementia OR AB Dementia                                                                                                                                  | (401)    |
|                 | #28                                                          | TI Amentia OR AB Amentia                                                                                                                                    | (1)      |
|                 | #29                                                          | (MH "Alzheimer's Disease")                                                                                                                                  | (194)    |
|                 | #30                                                          | TI Alzheimer OR AB Alzheimer                                                                                                                                | (273)    |
|                 | #31                                                          | (MH "Cognition Disorders+")                                                                                                                                 | (0)      |
|                 | #32                                                          | TI (Cognitive N1 Dysfunction*) OR AB (Cognitive N1 Dysfunction*)                                                                                            | (56)     |
|                 | #33                                                          | TI (Cognitive N1 Impair*) OR AB (Cognitive N1 Impair*)                                                                                                      | (292)    |
|                 | #34                                                          | TI (Cognitive N1 Disorder*) OR AB (Cognitive N1 Disorder*)                                                                                                  | (0)      |
|                 | #35                                                          | TI (Cognitive N1 Decline*) OR AB (Cognitive N1 Decline*)                                                                                                    | (80)     |
|                 | #36                                                          | TI (Cognitive N1 Deterior*) OR AB (Cognitive N1 Deterior*)                                                                                                  | (12)     |
|                 | #37                                                          | TI (Neurocognitive N1 Impair*) OR AB (Neurocognitive N1 Impair*)                                                                                            | (7)      |
|                 | #38                                                          | TI (Neurocognitive N1 Disorder*) OR AB (Neurocognitive N1 Disorder*)                                                                                        | (6)      |
|                 | #39                                                          | TI (Neurocognitive N1 Decline*) OR AB (Neurocognitive N1 Decline*)                                                                                          | (3)      |
|                 | #40                                                          | TI (Neurocognitive N1 Deterior*) OR AB (Neurocognitive N1 Deterior*)                                                                                        | (0)      |
|                 | #41                                                          | TI (Mental N1 Deterior*) OR AB (Mental N1 Deterior*)                                                                                                        | (5)      |
|                 | #42                                                          | S26 OR S27 OR S28 OR S29 OR S30 OR S31 OR S32 OR S33 OR S34 OR S35 OR S36 OR S37 OR S38 OR S39 OR S40 OR S41                                                | (925)    |
|                 | #43                                                          | S25 AND S42                                                                                                                                                 | (244)    |

| Database        | Web of Science<br>Date: 19/04/2021 |                                                                                                                                                             | Results |
|-----------------|------------------------------------|-------------------------------------------------------------------------------------------------------------------------------------------------------------|---------|
| Search Strategy | #1                                 | TS=Oral Health                                                                                                                                              | 202.433 |
|                 | #2                                 | TI=Oral Health                                                                                                                                              | 19.849  |
|                 | #3                                 | TS=Oral Hygiene                                                                                                                                             | 49.973  |
|                 | #4                                 | TI=Oral Hygiene                                                                                                                                             | 3.891   |
|                 | #5                                 | TI=Tooth Brush*                                                                                                                                             | 646     |
|                 | #6                                 | TI=Toothbrush*                                                                                                                                              | 3.251   |
|                 | #7                                 | TI=Dental Brush*                                                                                                                                            | 193     |
|                 | #8                                 | TS=Dental Devices                                                                                                                                           | 29.263  |
|                 | #9                                 | TI=Dental Floss*                                                                                                                                            | 268     |
|                 | #10                                | Ti=Dental Device*                                                                                                                                           | 752     |
|                 | #11                                | TI=Dental Cleaning                                                                                                                                          | 190     |
|                 | #12                                | TI=Dental Hygien*                                                                                                                                           | 5.22    |
|                 | #13                                | TS=Mouthwashes                                                                                                                                              | 8.121   |
|                 | #14                                | TI=Mouth Wash*                                                                                                                                              | 126     |
|                 | #15                                | TI=Mouthwash*                                                                                                                                               | 1.617   |
|                 | #16                                | TI=Oral Wash*                                                                                                                                               | 131     |
|                 | #17                                | TI=Oral Rinse*                                                                                                                                              | 451     |
|                 | #18                                | TI=Mouth Rinse*                                                                                                                                             | 532     |
|                 | #19                                | TS=Dentifrices                                                                                                                                              | 6.515   |
|                 | #20                                | TI=Dentifrice*                                                                                                                                              | 2.63    |
|                 | #21                                | TI=Toothpaste*                                                                                                                                              | 2.4     |
|                 | #22                                | TI=Tooth Paste*                                                                                                                                             | 269     |
|                 | #23                                | TI=Denture Clean*                                                                                                                                           | 412     |
|                 | #24                                | TI=Denture Hygiene                                                                                                                                          | 102     |
|                 | #25                                | #1 OR #2 OR #3 OR #4 OR #5 OR #6 OR #7 OR #8 OR #9 OR #10 OR #11 OR #12 OR #13 OR #14 OR #15 OR #16 OR #17 OR #18 OR #19 OR #20 OR #21 OR #22 OR #23 OR #24 | 266.138 |
|                 | #26                                | TS=Dementia                                                                                                                                                 | 224.973 |
|                 | #27                                | TI=Dementia                                                                                                                                                 | 78.156  |
|                 | #28                                | TI=Amentia                                                                                                                                                  | 69      |
|                 | #29                                | TS=Alzheimer Disease                                                                                                                                        | 225.907 |
|                 | #30                                | TI=Alzheimer                                                                                                                                                | 101.257 |
|                 | #31                                | TS=Cognitive Dysfunction                                                                                                                                    | 78.091  |
|                 | #32                                | TI=Cognitive Dysfunction*                                                                                                                                   | 6.141   |
|                 | #33                                | TI=Cognitive Impair*                                                                                                                                        | 32.345  |
|                 | #34                                | TI=Cognitive Disorder*                                                                                                                                      | 11.656  |
|                 | #35                                | TI=Cognitive Decline*                                                                                                                                       | 8.097   |
|                 | #36                                | TI=Cognitive Deterior*                                                                                                                                      | 757     |
|                 | #37                                | TI=Neurocognitive Impair*                                                                                                                                   | 1.019   |
|                 | #38                                | TI=Neurocognitive Disorder*                                                                                                                                 | 2.129   |
|                 | #39                                | TI=Neurocognitive Decline*                                                                                                                                  | 141     |
|                 | #40                                | TI=Neurocognitive Deterior*                                                                                                                                 | 17      |
|                 | #41                                | TI=Mental Deterior*                                                                                                                                         | 306     |
|                 | #42                                | #26 OR #27 OR #28 OR #29 OR #30 OR #31 OR #32 OR #33 OR #34 OR #35 OR #36 OR #37 OR #38 OR #39 OR #40 OR #41                                                | 445.241 |
|                 | #43                                | #25 AND #42                                                                                                                                                 | 1.926   |
